# Supplementary material for: Solution-phase, dual LSPR-SERS plasmonic sensors of high sensitivity and stability based on chitosan-coated anisotropic silver nanoparticles
Source: Royal Society of Chemistry journal article supplement (doi:10.1039/c0jm03329d), 2011-01-01
Supplement: c0jm03329d.pdf [file c0jm03329d.pdf]

## Supplementary Information

### **Solution-phase, dual LSPR-SERS plasmonic sensors of high sensitivity and stability based on chitosan-coated anisotropic silver nanoparticles**

**Monica Potara<sup>\*</sup>, Ana-Maria Gabudean and Simion Astilean<sup>\*</sup>**

Nanobiophotonics Center, Institute for Interdisciplinary Experimental Research in Bionanoscience and  
Faculty of Physics, Babes-Bolyai University, Treboniu Laurian Street 42, 400271 Cluj-Napoca,  
Romania.

E-mail: monica.potara@phys.ubbcluj.ro and simion.astilean@phys.ubbcluj.ro

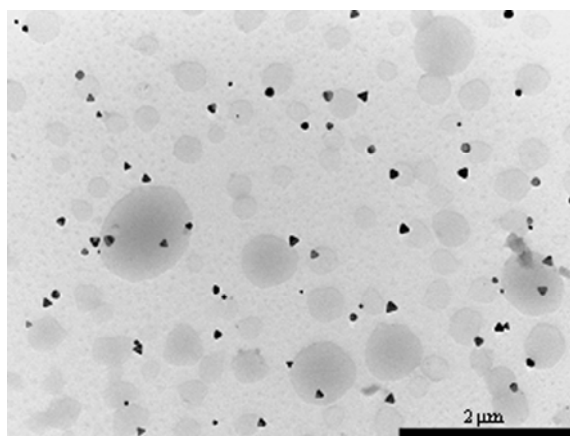

**Figure S1** Representative TEM image of sample prepared with 38.8 mM sodium citrate concentration.

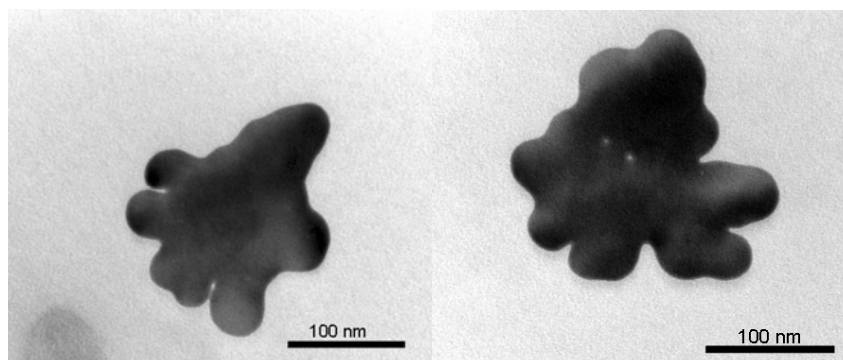

**Figure S2** Representative TEM images of sample obtained with a sodium citrate concentration beyond 38.8 mM.
